# Supplementary material for: Sex-Related Differences in Gene Expression Following Coxiella burnetii Infection in Mice: Potential Role of Circadian Rhythm
Source: PubMed Central journal article supplement (PMC2921390; doi:10.1371/journal.pone.0012190), 2010-08-13
Supplement: pone.0012190.s005.pdf [file pone.0012190.s005.pdf]

**Table S1.** Inversed fold changes in males and females

| <b>down-modulated in males<br/>up-regulated in females</b> |        |      | <b>up-regulated in males<br/>down-modulated in females</b> |     |       |
|------------------------------------------------------------|--------|------|------------------------------------------------------------|-----|-------|
| BB505010                                                   | - 12.5 | 2.6  | D930050A07Rik                                              | 1.8 | - 2.0 |
| Gm534                                                      | - 6.7  | 1.9  | PPP1R3C                                                    | 1.8 | - 2.2 |
| AK007854                                                   | - 5.6  | 1.9  | CHKA                                                       | 1.9 | - 2.6 |
| LHX8                                                       | - 3.1  | 1.9  | BAIAP2                                                     | 1.9 | - 2.7 |
| CYP3A44                                                    | - 2.4  | 2.7  | MLL5                                                       | 1.9 | - 2.0 |
| AACS                                                       | - 2.3  | 2.8  | MYBPC2                                                     | 1.9 | - 2.2 |
| RGS16                                                      | - 2.2  | 11.5 | FST                                                        | 1.9 | - 1.8 |
| AK051762                                                   | - 2.1  | 1.8  | CSPG5                                                      | 2.0 | - 2.7 |
| OPRM1                                                      | - 2.0  | 1.9  | BC057022                                                   | 2.1 | - 1.9 |
| 6030468B19Rik                                              | - 2.0  | 1.9  | AK040776                                                   | 2.3 | - 1.9 |
| Gm7231                                                     | - 1.9  | 3.4  | LOXL4                                                      | 2.4 | - 4.3 |
| OLFR1321                                                   | - 1.9  | 2.3  | EMID2                                                      | 2.9 | - 1.8 |
| BAI3                                                       | - 1.8  | 1.9  | COG4                                                       | 3.2 | - 1.8 |
| Gm10001                                                    | - 1.8  | 2.0  | OLFR914                                                    | 3.8 | - 3.0 |
