# Supplementary material for: Sex-Related Differences in Gene Expression Following Coxiella burnetii Infection in Mice: Potential Role of Circadian Rhythm
Source: PubMed Central journal article supplement (PMC2921390; doi:10.1371/journal.pone.0012190), 2010-08-13
Supplement: pone.0012190.s006.pdf [file pone.0012190.s006.pdf]

**Table S2.** Fold changes assessed by microarray and RT-PCR

|       | <b>Fold change</b> |         |               |         |
|-------|--------------------|---------|---------------|---------|
|       | <b>microarray</b>  |         | <b>RT-PCR</b> |         |
|       | males              | females | males         | females |
| IL6   | 1.3                | 2.2     | 1.3           | 1.2     |
| IFNG  | - 1.1              | - 1.1   | - 1.7         | 1.0     |
| IL10  | 1.7                | 1.2     | 2.1           | 1.2     |
| ARNTL | 1.4                | - 11.1  | 1.0           | -18     |
| CLOCK | 1.1                | - 2.6   | 1.0           | - 4.7   |
| PER2  | 1.2                | 3.91    | 1.1           | 4.0     |
